# Supplementary material for: Side Effects of Kaolin and Bunch-Zone Leaf Removal on Generalist Predators in Vineyards
Source: MDPI journal article supplement (doi:10.3390/insects14020126), 2023-01-25
Supplement: s1 [file s1]

**Table S1.** Spiders collected with the drop cloth method in vineyards and years. For each taxon, label is reported as used in Figure 1.

| Taxon and hunting strategy |                      |                                           | Label     | Vineyard<br>A 2015 | Vineyard<br>A 2016 | Vineyard<br>B 2015 | Vineyard<br>C 2016 | N.         |
|----------------------------|----------------------|-------------------------------------------|-----------|--------------------|--------------------|--------------------|--------------------|------------|
| Web-builders               | Araneidae            | <i>Araneus</i> sp. A juvenile             | Ara.A     | 3                  | -                  | 3                  | -                  | 6          |
|                            |                      | <i>Araneus</i> sp. B                      | Ara.B     | -                  | 3                  | 2                  | 3                  | 8          |
|                            |                      | <i>Mangora acalypha</i> (Walckenaer)      | M.a.      | 1                  | 3                  | 13                 | 3                  | 20         |
|                            |                      | <i>Nuctenea</i> sp.                       | Nuc.      | 8                  | 5                  | 6                  | 11                 | 30         |
|                            |                      | <i>Zilla diodia</i> (Walckenaer)          | Z.d.      | -                  | -                  | 1                  | -                  | 1          |
|                            |                      | Araneidae sp. C                           | Ara.C     | -                  | -                  | 1                  | -                  | 1          |
|                            |                      | Araneidae sp. D                           | Ara.D     | -                  | -                  | 1                  | -                  | 1          |
|                            |                      | Araneidae juvenile                        | Ara.j.    | -                  | -                  | 5                  | -                  | 5          |
|                            |                      | <b>Total Araneidae</b>                    |           | <b>12</b>          | <b>11</b>          | <b>32</b>          | <b>17</b>          | <b>72</b>  |
|                            | Linyphiidae          | Erigoninae, sp. A                         | Eri.A     | -                  | 3                  | -                  | 8                  | 11         |
|                            |                      | Erigoninae, sp. B                         | Eri.B     | -                  | 1                  | 2                  | -                  | 3          |
|                            |                      | <i>Neriene</i> sp.                        | Ner.      | 1                  | 2                  | 18                 | -                  | 21         |
|                            |                      | Linyphiinae sp                            | Lin.      | 1                  | -                  | -                  | -                  | 1          |
|                            |                      | <b>Total Linyphiidae</b>                  |           | <b>2</b>           | <b>6</b>           | <b>20</b>          | <b>8</b>           | <b>36</b>  |
|                            | Theridiidae          | <i>Theridion</i> sp.                      | The.      | 3                  | 1                  | 9                  | -                  | 13         |
| <b>Total web-builders</b>  |                      |                                           | <b>17</b> | <b>18</b>          | <b>61</b>          | <b>25</b>          | <b>121</b>         |            |
| Hunters                    | Thomisidae           | <i>Runcinia grammica</i> (C.L. Koch)      | R.g.      | -                  | 13                 | 5                  | 1                  | 19         |
|                            | (ambushers)          | <i>Runcinia</i> sp.                       | Run.      | 1                  | -                  | 3                  |                    | 4          |
|                            |                      | <i>Synema globosum</i> (Fabricius)        | S.g.      | 3                  | 1                  | -                  | 1                  | 5          |
|                            |                      | <i>Thomisus</i> sp.                       | Tho.      | 7                  | 1                  | 10                 | -                  | 18         |
|                            |                      | <i>Xysticus</i> sp.                       | Xys.      | 20                 | 12                 | 35                 | 3                  | 70         |
|                            |                      | <b>Total Thomisidae</b>                   |           | <b>31</b>          | <b>27</b>          | <b>53</b>          | <b>5</b>           | <b>116</b> |
|                            | Gnaphosidae          | <i>Drassodes</i> sp.                      | Dra.      | -                  | 3                  | 12                 | 1                  | 16         |
|                            | (active)             | Gnaphosidae sp.                           | Gna.      | 4                  | -                  | -                  | -                  | 4          |
|                            |                      | <b>Total Gnaphosidae</b>                  |           | <b>4</b>           | <b>3</b>           | <b>12</b>          | <b>1</b>           | <b>20</b>  |
|                            | Miturgidae (active)  | <i>Cheiracanthium</i> sp.                 | Che.      | -                  | 1                  | -                  | 1                  | 2          |
|                            | Oxyopidae (active)   | <i>Oxyopes lineatus</i> Latreille         | O.l.      | 1                  | -                  | 6                  | -                  | 7          |
|                            |                      | <i>Oxyopes</i> sp.                        | Oxy.      | 12                 | 2                  | 13                 | 13                 | 40         |
|                            |                      | <b>Total Oxyopidae</b>                    |           | <b>13</b>          | <b>2</b>           | <b>19</b>          | <b>13</b>          | <b>47</b>  |
|                            |                      | <i>Pseudeuophrys</i> sp.                  | Pse.      | -                  | -                  | 1                  | -                  | 1          |
|                            | Salticidae (active)  | <i>Pseudicius encarpatus</i> (Walckenaer) | P.e.      | -                  | 8                  | -                  | 6                  | 14         |
|                            |                      | <i>Salticus scenicus</i> (Clerck)         | S.s.      | -                  | -                  | 1                  | 6                  | 7          |
|                            |                      | Salticidae juvenile                       | Sal.j.    | 5                  | 4                  | 9                  | 3                  | 21         |
|                            |                      | <b>Total Salticidae</b>                   |           | <b>5</b>           | <b>12</b>          | <b>11</b>          | <b>15</b>          | <b>43</b>  |
|                            | Sparassidae (active) | <i>Micrommata virescens</i> (Clerck)      | M.v.      | -                  | 2                  | 4                  | -                  | 6          |
| <b>Total hunters</b>       |                      |                                           | <b>53</b> | <b>47</b>          | <b>99</b>          | <b>35</b>          | <b>234</b>         |            |
| <b>Total spiders</b>       |                      |                                           | <b>70</b> | <b>65</b>          | <b>160</b>         | <b>60</b>          | <b>355</b>         |            |

**Table S2.** Predatory insects and spiders captured by yellow sticky traps in 2015 in Vineyards A and B.

| Taxon                                                    | Vineyard A 2015 | Vineyard B 2015 | Total       |
|----------------------------------------------------------|-----------------|-----------------|-------------|
| Insects                                                  |                 |                 |             |
| <i>Aeolothrips</i> sp. (Thysanoptera: Aeolothripidae)    | 1045            | 1185            | 2230        |
| Scymninae (Coleoptera: Coccinellidae)                    | 76              | 307             | 383         |
| Coccinellidae non- Scymninae                             | 53              | 121             | 174         |
| <i>Chrysoperla carnea</i> s.l. (Neuroptera: Chrysopidae) | 26              | 37              | 63          |
| <i>Orius</i> sp. (Hemiptera: Anthocoridae)               | 29              | 31              | 60          |
| <b>Total insects</b>                                     | <b>1229</b>     | <b>1681</b>     | <b>2910</b> |
| Spiders                                                  |                 |                 |             |
| Web-builders                                             | 93              | 127             | 220         |
| Hunters                                                  | 127             | 192             | 319         |
| Gnaphosidae                                              | 5               | 12              | 17          |
| Oxyopidae                                                | 11              | 36              | 47          |
| Salticidae                                               | 43              | 44              | 87          |
| Thomisidae                                               | 68              | 100             | 168         |
| <b>Total spiders</b>                                     | <b>220</b>      | <b>319</b>      | <b>539</b>  |
| <b>Total predatory arthropods</b>                        | <b>1449</b>     | <b>2000</b>     | <b>3449</b> |
